# Supplementary material for: A Transfer-Learning-Based Deep Convolutional Neural Network for Predicting Leukemia-Related Phosphorylation Sites from Protein Primary Sequences
Source: MDPI journal article supplement (doi:10.3390/ijms23031741), 2022-02-03

## Supplementary Material

**Table S1.** The list of the top 20 enriched functional pathways for genes with leukemia-related phosphorylation sites.

(1) Leukemia-related phosphorylation data

| GO            | Category                | Description                                      | Count | %     | Log10(P) | Log10(q) |
|---------------|-------------------------|--------------------------------------------------|-------|-------|----------|----------|
| R-HSA-194315  | Reactome Gene Sets      | Signaling by Rho GTPases                         | 179   | 10.51 | -63.10   | -58.74   |
| GO:0030029    | GO Biological Processes | actin filament-based process                     | 168   | 9.86  | -47.10   | -43.34   |
| GO:0044770    | GO Biological Processes | cell cycle phase transition                      | 138   | 8.10  | -39.45   | -35.87   |
| R-HSA-199991  | Reactome Gene Sets      | Membrane Trafficking                             | 130   | 7.63  | -34.83   | -31.47   |
| GO:0007264    | GO Biological Processes | small GTPase mediated signal transduction        | 111   | 6.52  | -32.82   | -29.64   |
| R-HSA-1640170 | Reactome Gene Sets      | Cell Cycle                                       | 131   | 7.69  | -31.38   | -28.25   |
| WP107         | WikiPathways            | Translation Factors                              | 36    | 2.11  | -30.95   | -27.84   |
| GO:0048285    | GO Biological Processes | organelle fission                                | 105   | 6.17  | -29.83   | -26.75   |
| GO:0051640    | GO Biological Processes | organelle localization                           | 123   | 7.22  | -29.12   | -26.10   |
| GO:0120031    | GO Biological Processes | plasma membrane bounded cell projection assembly | 111   | 6.52  | -24.73   | -21.94   |
| GO:0022604    | GO Biological Processes | regulation of cell morphogenesis                 | 74    | 4.35  | -24.63   | -21.85   |
| WP3888        | WikiPathways            | VEGFA-VEGFR2 Signaling Pathway                   | 87    | 5.11  | -22.32   | -19.59   |
| R-HSA-8980692 | Reactome Gene Sets      | RHOA GTPase cycle                                | 48    | 2.82  | -22.14   | -19.42   |
| GO:0045859    | GO Biological Processes | regulation of protein kinase activity            | 122   | 7.16  | -20.73   | -18.06   |
| GO:0032989    | GO Biological Processes | cellular component morphogenesis                 | 111   | 6.52  | -17.11   | -14.55   |
| GO:0031344    | GO Biological Processes | regulation of cell projection organization       | 100   | 5.87  | -17.01   | -14.46   |
| GO:0033044    | GO Biological Processes | regulation of chromosome organization            | 58    | 3.41  | -16.52   | -13.98   |
| R-HSA-6807878 | Reactome Gene Sets      | COPI-mediated anterograde transport              | 34    | 2.00  | -16.35   | -13.82   |

|            |                         |                                               |     |      |        |        |
|------------|-------------------------|-----------------------------------------------|-----|------|--------|--------|
| GO:0034330 | GO Biological Processes | cell junction organization                    | 103 | 6.05 | -16.33 | -13.81 |
| GO:0010639 | GO Biological Processes | negative regulation of organelle organization | 66  | 3.88 | -16.18 | -13.68 |

(2) Lymphocytic leukemia-related phosphorylation data

| GO            | Category                | Description                                         | Count | %    | Log10(P) | Log10(q) |
|---------------|-------------------------|-----------------------------------------------------|-------|------|----------|----------|
| GO:0016071    | GO Biological Processes | mRNA metabolic process                              | 196   | 9.26 | -77.64   | -73.30   |
| GO:0006325    | GO Biological Processes | chromatin organization                              | 182   | 8.60 | -71.12   | -67.07   |
| GO:0000278    | GO Biological Processes | mitotic cell cycle                                  | 183   | 8.64 | -69.37   | -65.50   |
| R-HSA-194315  | Reactome Gene Sets      | Signaling by Rho GTPases                            | 201   | 9.49 | -68.74   | -64.99   |
| R-HSA-1640170 | Reactome Gene Sets      | Cell Cycle                                          | 197   | 9.31 | -67.56   | -63.92   |
| GO:0006974    | GO Biological Processes | cellular response to DNA damage stimulus            | 193   | 9.12 | -62.56   | -59.11   |
| GO:1903311    | GO Biological Processes | regulation of mRNA metabolic process                | 110   | 5.20 | -50.71   | -47.51   |
| GO:0010564    | GO Biological Processes | regulation of cell cycle process                    | 173   | 8.17 | -50.60   | -47.43   |
| GO:0016570    | GO Biological Processes | histone modification                                | 124   | 5.86 | -48.66   | -45.51   |
| GO:0051052    | GO Biological Processes | regulation of DNA metabolic process                 | 123   | 5.81 | -45.32   | -42.25   |
| GO:0050684    | GO Biological Processes | regulation of mRNA processing                       | 67    | 3.16 | -39.31   | -36.31   |
| GO:0033044    | GO Biological Processes | regulation of chromosome organization               | 80    | 3.78 | -36.99   | -34.06   |
| GO:0006468    | GO Biological Processes | protein phosphorylation                             | 151   | 7.13 | -35.61   | -32.72   |
| R-HSA-2262752 | Reactome Gene Sets      | Cellular responses to stress                        | 157   | 7.42 | -34.89   | -32.02   |
| GO:0022613    | GO Biological Processes | ribonucleoprotein complex biogenesis                | 112   | 5.29 | -32.85   | -30.05   |
| GO:0034654    | GO Biological Processes | nucleobase-containing compound biosynthetic process | 148   | 6.99 | -32.57   | -29.78   |
| GO:0000226    | GO Biological Processes | microtubule cytoskeleton organization               | 122   | 5.76 | -32.37   | -29.59   |

|               |                         |                                              |     |      |        |        |
|---------------|-------------------------|----------------------------------------------|-----|------|--------|--------|
| R-HSA-3108232 | Reactome Gene Sets      | SUMO E3 ligases<br>SUMOylate target proteins | 68  | 3.21 | -31.36 | -28.60 |
| GO:0060341    | GO Biological Processes | regulation of cellular localization          | 152 | 7.18 | -30.07 | -27.39 |
| WP3888        | WikiPathways            | VEGFA-VEGFR2 signaling pathway               | 106 | 5.01 | -29.36 | -26.72 |

(3) Myelogenous leukemia-related phosphorylation data (Chronic)

| GO            | Category                | Description                                 | Count | %     | Log10(P) | Log10(q) |
|---------------|-------------------------|---------------------------------------------|-------|-------|----------|----------|
| R-HSA-194315  | Reactome Gene Sets      | Signaling by Rho GTPases                    | 152   | 12.28 | -61.81   | -57.45   |
| GO:0030029    | GO Biological Processes | actin filament-based process                | 138   | 11.15 | -44.17   | -40.41   |
| GO:0007264    | GO Biological Processes | small GTPase mediated signal transduction   | 93    | 7.51  | -31.88   | -28.37   |
| GO:0010564    | GO Biological Processes | regulation of cell cycle process            | 118   | 9.53  | -31.24   | -27.83   |
| R-HSA-199991  | Reactome Gene Sets      | Membrane Trafficking                        | 103   | 8.32  | -30.28   | -27.00   |
| WP107         | WikiPathways            | Translation Factors                         | 32    | 2.58  | -29.47   | -26.26   |
| GO:0051301    | GO Biological Processes | cell division                               | 94    | 7.59  | -26.41   | -23.33   |
| R-HSA-1640170 | Reactome Gene Sets      | Cell Cycle                                  | 101   | 8.16  | -25.86   | -22.84   |
| GO:0051640    | GO Biological Processes | organelle localization                      | 95    | 7.67  | -24.12   | -21.14   |
| GO:0022604    | GO Biological Processes | regulation of cell morphogenesis            | 60    | 4.85  | -22.08   | -19.21   |
| R-HSA-8980692 | Reactome Gene Sets      | RHOA GTPase cycle                           | 41    | 3.31  | -21.21   | -18.40   |
| WP3888        | WikiPathways            | VEGFA-VEGFR2 Signaling Pathway              | 71    | 5.74  | -20.83   | -18.02   |
| R-HSA-9006934 | Reactome Gene Sets      | Signaling by Receptor Tyrosine Kinases      | 71    | 5.74  | -17.31   | -14.67   |
| GO:0051347    | GO Biological Processes | positive regulation of transferase activity | 84    | 6.79  | -16.88   | -14.27   |
| GO:0034330    | GO Biological Processes | cell junction organization                  | 85    | 6.87  | -16.62   | -14.02   |
| GO:0032989    | GO Biological Processes | cellular component morphogenesis            | 89    | 7.19  | -16.22   | -13.63   |

|            |                         |                                             |    |      |        |        |
|------------|-------------------------|---------------------------------------------|----|------|--------|--------|
| ko05100    | KEGG Pathway            | Bacterial invasion of epithelial cells      | 26 | 2.10 | -16.12 | -13.55 |
| GO:0031344 | GO Biological Processes | regulation of cell projection organization  | 80 | 6.46 | -15.85 | -13.29 |
| GO:0031032 | GO Biological Processes | actomyosin structure organization           | 39 | 3.15 | -14.98 | -12.48 |
| GO:1903827 | GO Biological Processes | regulation of cellular protein localization | 70 | 5.65 | -14.92 | -12.44 |

(4) T-Cell leukemia-related phosphorylation data

| GO            | Category                | Description                               | Count | %     | Log10(P) | Log10(q) |
|---------------|-------------------------|-------------------------------------------|-------|-------|----------|----------|
| WP437         | WikiPathways            | EGF/EGFR Signaling Pathway                | 30    | 9.58  | -27.02   | -22.66   |
| M122          | Canonical Pathways      | PID IL2 1PATHWAY                          | 20    | 6.39  | -24.80   | -20.74   |
| R-HSA-194315  | Reactome Gene Sets      | Signaling by Rho GTPases                  | 45    | 14.38 | -20.66   | -16.78   |
| WP395         | WikiPathways            | IL-4 Signaling Pathway                    | 16    | 5.11  | -18.13   | -14.55   |
| GO:0030036    | GO Biological Processes | actin cytoskeleton organization           | 39    | 12.46 | -15.94   | -12.57   |
| GO:1903311    | GO Biological Processes | regulation of mRNA metabolic process      | 28    | 8.95  | -15.89   | -12.57   |
| WP3888        | WikiPathways            | VEGFA-VEGFR2 Signaling Pathway            | 30    | 9.58  | -14.58   | -11.36   |
| GO:0007264    | GO Biological Processes | small GTPase mediated signal transduction | 29    | 9.27  | -12.25   | -9.32    |
| GO:0006397    | GO Biological Processes | mRNA processing                           | 30    | 9.58  | -12.11   | -9.24    |
| GO:0018105    | GO Biological Processes | peptidyl-serine phosphorylation           | 22    | 7.03  | -11.13   | -8.43    |
| GO:0038127    | GO Biological Processes | ERBB signaling pathway                    | 16    | 5.11  | -11.06   | -8.36    |
| GO:0045859    | GO Biological Processes | regulation of protein kinase activity     | 34    | 10.86 | -10.59   | -7.96    |
| M34           | Canonical Pathways      | PID TCR PATHWAY                           | 11    | 3.51  | -10.01   | -7.53    |
| GO:0006735    | GO Biological Processes | NADH regeneration                         | 8     | 2.56  | -9.41    | -7.02    |
| GO:0002831    | GO Biological Processes | regulation of response to biotic stimulus | 23    | 7.35  | -9.36    | -7.00    |
| R-HSA-8980692 | Reactome Gene Sets      | RHOA GTPase cycle                         | 14    | 4.47  | -8.93    | -6.65    |

|               |                         |                                                           |    |      |       |       |
|---------------|-------------------------|-----------------------------------------------------------|----|------|-------|-------|
| R-HSA-2029482 | Reactome Gene Sets      | Regulation of actin dynamics for phagocytic cup formation | 10 | 3.19 | -8.87 | -6.60 |
| GO:0042110    | GO Biological Processes | T cell activation                                         | 23 | 7.35 | -8.34 | -6.14 |
| M82           | Canonical Pathways      | PID RET PATHWAY                                           | 8  | 2.56 | -8.01 | -5.85 |
| GO:0030099    | GO Biological Processes | myeloid cell differentiation                              | 21 | 6.71 | -7.88 | -5.74 |

\* "Count" is the number of genes in the given ontology term. "%" is the percentage of genes for the given ontology term in all 2446 found genes."Log10(P)" is the p-value in log base 10. "Log10(q)" is the multi-test adjusted p-value in log base 10.

**Table S2.** Detailed prediction results of the five traditional machine-learning methods

| Machine Learning | Data | SE     | SP     | ACC    | MCC    | AUC    |
|------------------|------|--------|--------|--------|--------|--------|
| SVM              | Ser  | 0.5251 | 0.8271 | 0.6763 | 0.3696 | 0.6761 |
|                  | Tyr  | 0.4482 | 0.8452 | 0.6474 | 0.3197 | 0.6466 |
|                  | Thr  | 0.5556 | 0.685  | 0.6206 | 0.2427 | 0.6203 |
| NB               | Ser  | 0.2663 | 0.9164 | 0.5916 | 0.2404 | 0.5913 |
|                  | Tyr  | 0.1806 | 0.9965 | 0.5896 | 0.3051 | 0.5886 |
|                  | Thr  | 0.0854 | 0.9865 | 0.5105 | 0.1351 | 0.5033 |
| KNN              | Ser  | 0.6313 | 0.5261 | 0.5786 | 0.1582 | 0.5787 |
|                  | Tyr  | 0.4089 | 0.7549 | 0.5797 | 0.1682 | 0.5792 |
|                  | Thr  | 0.6274 | 0.5354 | 0.5812 | 0.1631 | 0.5812 |
| RF               | Ser  | 0.6778 | 0.9204 | 0.7993 | 0.6169 | 0.7991 |
|                  | Tyr  | 0.4981 | 0.8821 | 0.6908 | 0.4121 | 0.6901 |
|                  | Thr  | 0.6008 | 0.8866 | 0.7443 | 0.5093 | 0.7437 |
| XGB              | Ser  | 0.8194 | 0.9108 | 0.8651 | 0.7333 | 0.8651 |
|                  | Tyr  | 0.6284 | 0.7698 | 0.6992 | 0.4023 | 0.6989 |
|                  | Thr  | 0.6429 | 0.8661 | 0.7549 | 0.5224 | 0.7545 |

**Figure S1. Top 20 clusters with their representative enriched terms (one per cluster) of genes which have leukemia-related phosphorylation sites.**

(1) Myelogenous leukemia

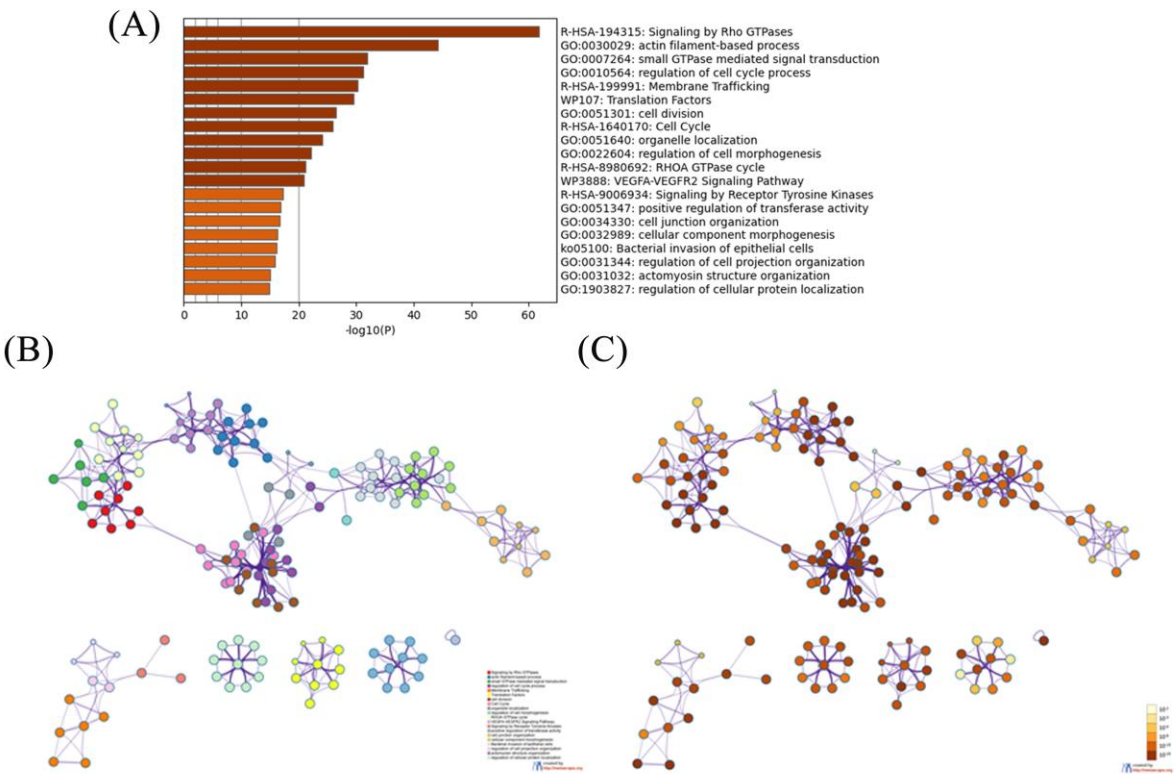

(2) Lymphocytic leukemia

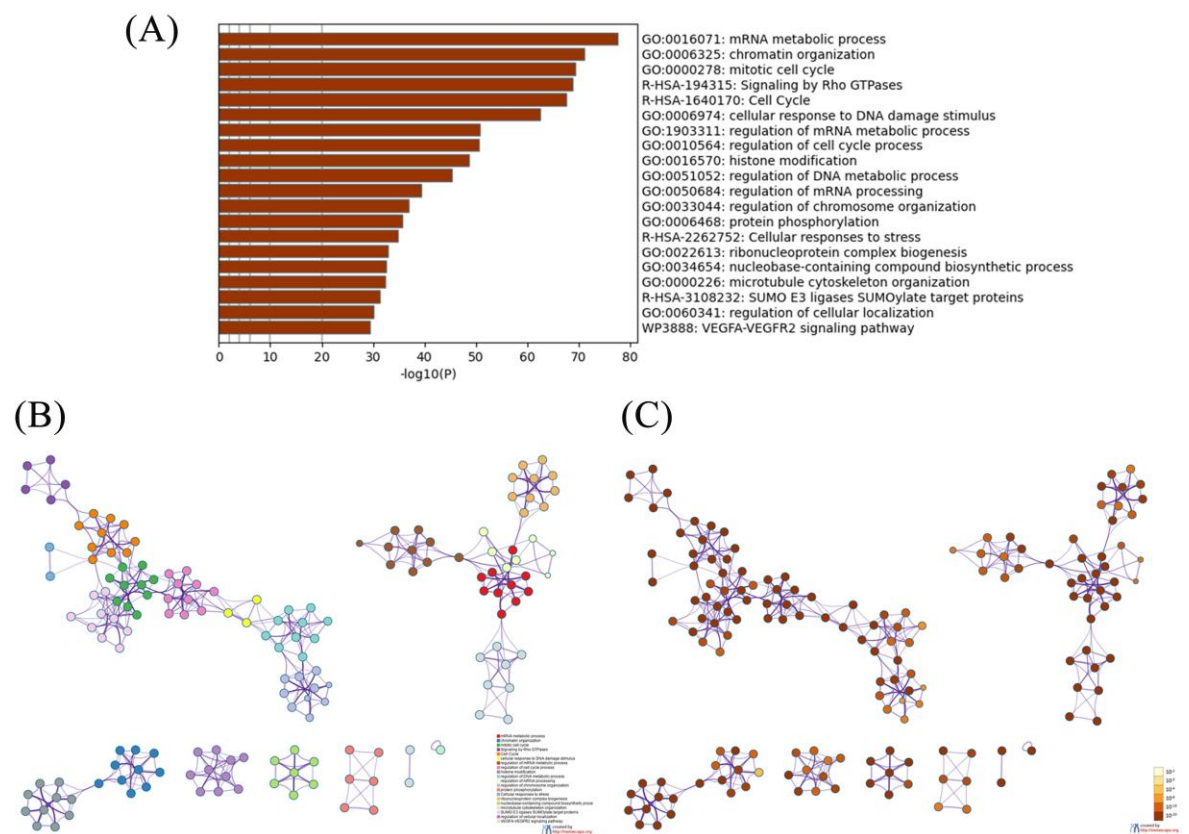

(3) T-Cell leukemia

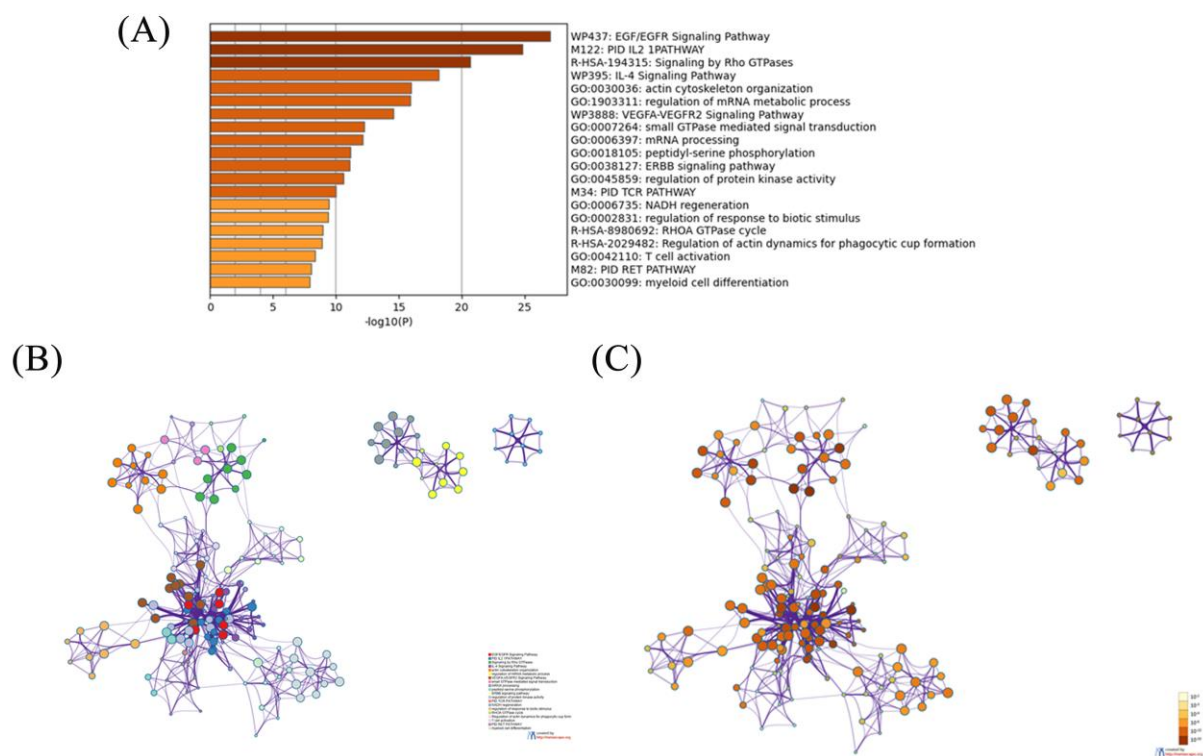

**Figure S2. Clustering diagram of S, T and Y datasets.**



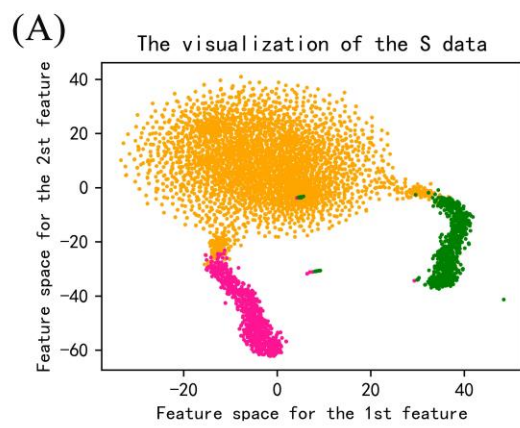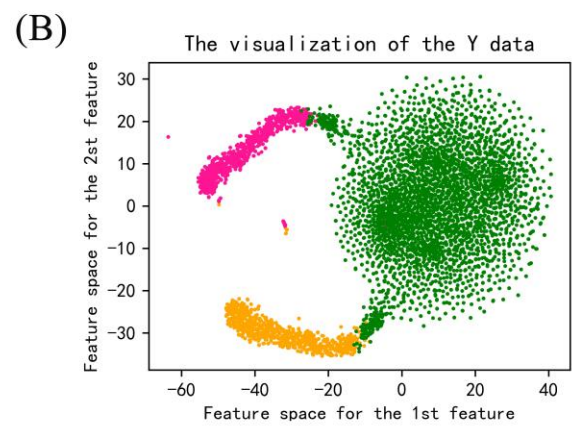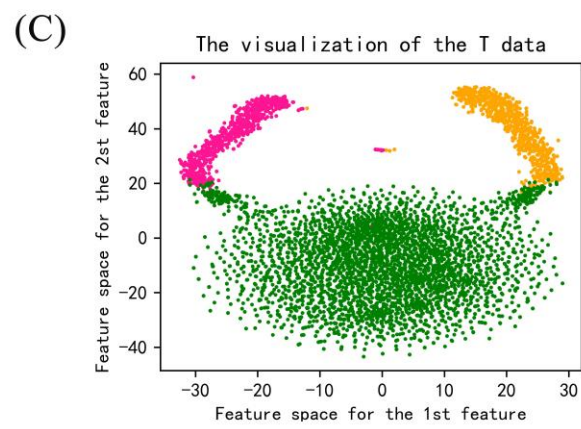

Supplement: s1 [file s1]
